# Supplementary material for: Prediction of transition metal carbonitride monolayers MN4C6 (M = Cr, Mn, Fe, and Co) made up of a benzene ring and a planar MN4 moiety
Source: Royal Society of Chemistry journal article supplement (doi:10.1039/d3cp04243j), 2023-12-20
Supplement: d3cp04243j1.pdf [file d3cp04243j1.pdf]

## Electronic Supplementary Information

### 1. The detailed atomic position of the predicted structures

#### A: $\text{CrN}_4\text{C}_6$

Primitive Cell

1.0

|               |              |               |
|---------------|--------------|---------------|
| 4.8384070396  | 0.0000000000 | 0.0000000000  |
| -0.5138389787 | 6.5830143660 | 0.0000000000  |
| 0.0000000000  | 0.0000000000 | 16.0000000000 |

C N Cr

6 4 1

Direct

|             |             |             |
|-------------|-------------|-------------|
| 0.025575197 | 0.222872716 | 0.500000000 |
| 0.738839859 | 0.896706653 | 0.500000000 |
| 0.240954106 | 0.887305890 | 0.500000000 |
| 0.974424750 | 0.777127266 | 0.500000000 |
| 0.759045919 | 0.112694164 | 0.500000000 |
| 0.261160157 | 0.103293320 | 0.500000000 |
| 0.903438055 | 0.568670096 | 0.500000000 |
| 0.517620695 | 0.207704449 | 0.500000000 |
| 0.096562004 | 0.431329958 | 0.500000000 |
| 0.482379307 | 0.792295624 | 0.500000000 |
| 0.499999973 | 0.500000009 | 0.500000000 |

#### B: $\text{MnN}_4\text{C}_6$

Primitive Cell

1.0

|               |              |               |
|---------------|--------------|---------------|
| 4.8111515045  | 0.0000000000 | 0.0000000000  |
| -0.5504593605 | 6.5168075854 | 0.0000000000  |
| 0.0000000000  | 0.0000000000 | 16.0000000000 |

C N Mn

6 4 1

Direct

|             |             |             |
|-------------|-------------|-------------|
| 0.028977453 | 0.222293841 | 0.500000000 |
| 0.737650496 | 0.897008616 | 0.500000000 |
| 0.240178036 | 0.885442650 | 0.500000000 |
| 0.971022538 | 0.777706173 | 0.500000000 |
| 0.759821945 | 0.114557336 | 0.500000000 |
| 0.262349497 | 0.102991361 | 0.500000000 |
| 0.898319768 | 0.566788000 | 0.500000000 |
| 0.519523257 | 0.213142991 | 0.500000000 |
| 0.101680301 | 0.433211995 | 0.500000000 |
| 0.480476688 | 0.786857005 | 0.500000000 |

0.499999997            0.499999998            0.500000000

**C: FeN<sub>4</sub>C<sub>6</sub>**

Primitive Cell

1.0

|               |              |               |
|---------------|--------------|---------------|
| 4.7858681679  | 0.0000000000 | 0.0000000000  |
| -0.5439361689 | 6.4794524632 | 0.0000000000  |
| 0.0000000000  | 0.0000000000 | 16.0000000000 |

| C | N | Fe |
|---|---|----|
| 6 | 4 | 1  |

Direct

|             |             |             |
|-------------|-------------|-------------|
| 0.029100483 | 0.223348719 | 0.500000000 |
| 0.736636379 | 0.896582450 | 0.500000000 |
| 0.241313292 | 0.884277466 | 0.500000000 |
| 0.970899499 | 0.776651303 | 0.500000000 |
| 0.758686666 | 0.115722538 | 0.500000000 |
| 0.263363698 | 0.103417499 | 0.500000000 |
| 0.896762494 | 0.565546449 | 0.500000000 |
| 0.519144356 | 0.215724899 | 0.500000000 |
| 0.103237619 | 0.434453610 | 0.500000000 |
| 0.480855650 | 0.784275087 | 0.500000000 |
| 0.499999993 | 0.500000011 | 0.500000000 |

**D: CoN<sub>4</sub>C<sub>6</sub>**

Primitive Cell

1.0

|               |              |               |
|---------------|--------------|---------------|
| 4.7636513710  | 0.0000000000 | 0.0000000000  |
| -0.5611254759 | 6.4265851910 | 0.0000000000  |
| 0.0000000000  | 0.0000000000 | 16.0000000000 |

| C | N | Co |
|---|---|----|
| 6 | 4 | 1  |

Direct

|             |             |             |
|-------------|-------------|-------------|
| 0.030136787 | 0.223934404 | 0.500000000 |
| 0.735221943 | 0.895952121 | 0.500000000 |
| 0.241838696 | 0.882962942 | 0.500000000 |
| 0.969863281 | 0.776065578 | 0.500000000 |
| 0.758161318 | 0.117037040 | 0.500000000 |
| 0.264778068 | 0.104047833 | 0.500000000 |
| 0.895903539 | 0.564242318 | 0.500000000 |
| 0.519772064 | 0.218594477 | 0.500000000 |
| 0.104096473 | 0.435757757 | 0.500000000 |
| 0.480227925 | 0.781405505 | 0.500000000 |
| 0.500000021 | 0.500000001 | 0.500000000 |

## 2. Four configurations of $MN_4C_6$ layer.

In a graphene sheet, we choose two neighboring benzene rings, and there are only two basic types of configurations, i.e., gray and blue circles in Fig. S1 (a) and gray and red circles in Fig. S1 (b). There, the dashed circles are the equivalent circles to the blue or red solid circle. In Fig. S1 (c) and (d), the structural fraction enclosed by a solid rectangle would be replaced by  $MN_4$  moiety. Then, after the replacement, two basic structural patterns are formed and shown in Fig. S1 (e) and (f).

Based on the two basic structural patterns, four kinds of  $MN_4C_6$  monolayers are built, displayed in the Fig. S2 (a) – (d), in which the structure in Fig. S2 (b) is adopted in our manuscript. We take  $MnN_4C_6$  as an example to calculate their energies and they are -95.2116 eV, **-96.5271 eV**, -96.0484 eV, -95.8902 eV per formula cell for the four kinds of  $MN_4C_6$  ( $M = Mn$ ) in Fig. S2 (a)-(d), respectively. This demonstrates that the  $MN_4C_6$  ( $M = Mn$ ) structure in the manuscript is the lowest energy structure.

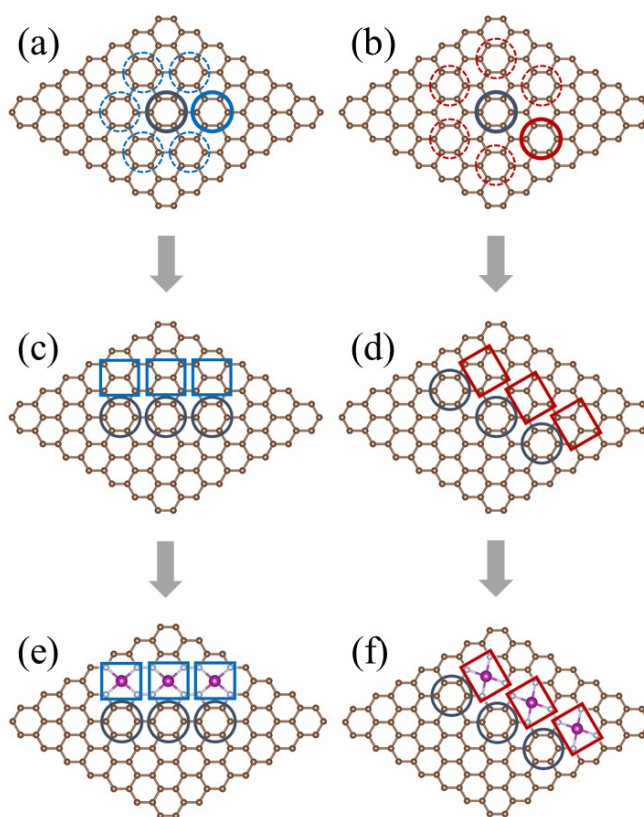

Fig. S1 Flow Chart to form the two basic patterns of arrangement for benzene ring and  $MN_4$  moieties in the graphene sheet.

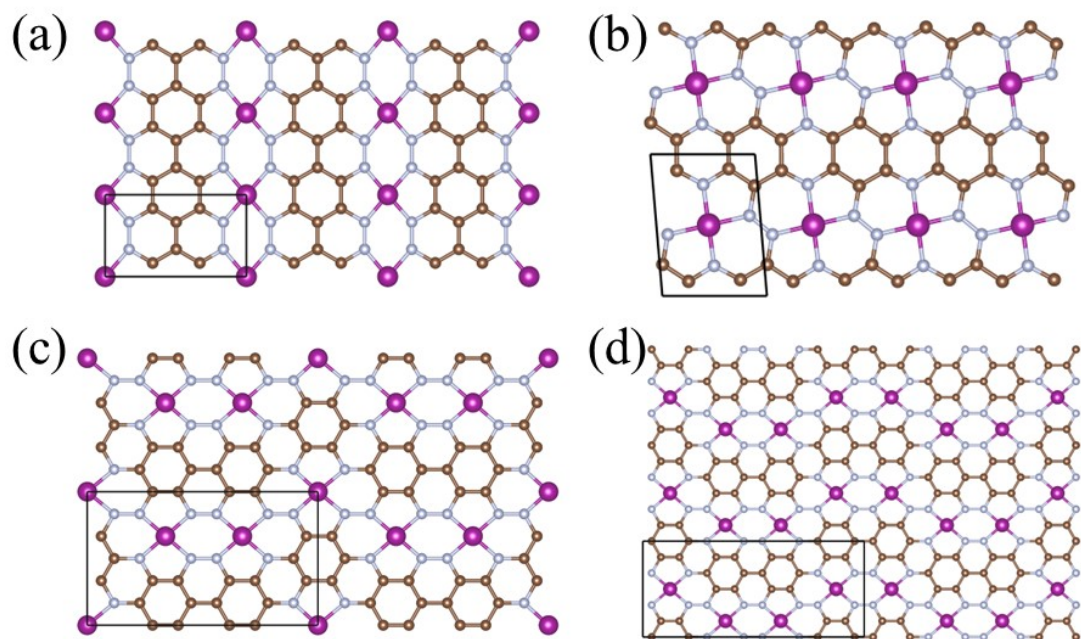

Fig. S2 Four kinds of  $MN_4C_6$  configurations composed of  $MN_4$  and benzene ring moieties, derived from the two basic structural patterns in Fig. S1(e) and (f). The unit cells are marked by the solid lines.
